# Supplementary material for: The ZnSn(OH)6nanocube–graphene composite as an anode material for Li-ion batteries
Source: Royal Society of Chemistry journal article supplement (doi:10.1039/c4cp02842b), 2014-08-04
Supplement: c4cp02842b1.pdf [file c4cp02842b1.pdf]

## Electronic Supplementary Information (ESI)

### ZnSn(OH)<sub>6</sub> nanocube/graphene composite as an anode material for Li-ion batteries

Caiyun Chen<sup>a, b</sup>, Xiangzhen Zheng<sup>a, b</sup>, Jie Yang<sup>a, b</sup>, Mingdeng Wei<sup>\*a, b</sup>

<sup>a</sup> State Key Laboratory of Photocatalysis on Energy and Environment, Fuzhou University, Fuzhou, Fujian 350002, China

<sup>b</sup> Institute of Advanced Energy Materials, Fuzhou University, Fuzhou, Fujian 350002, China

\*Corresponding author: Mingdeng Wei

Tel./fax: +86-591-83753180

E-mail address: [wei-mingdeng@fzu.edu.cn](mailto:wei-mingdeng@fzu.edu.cn)

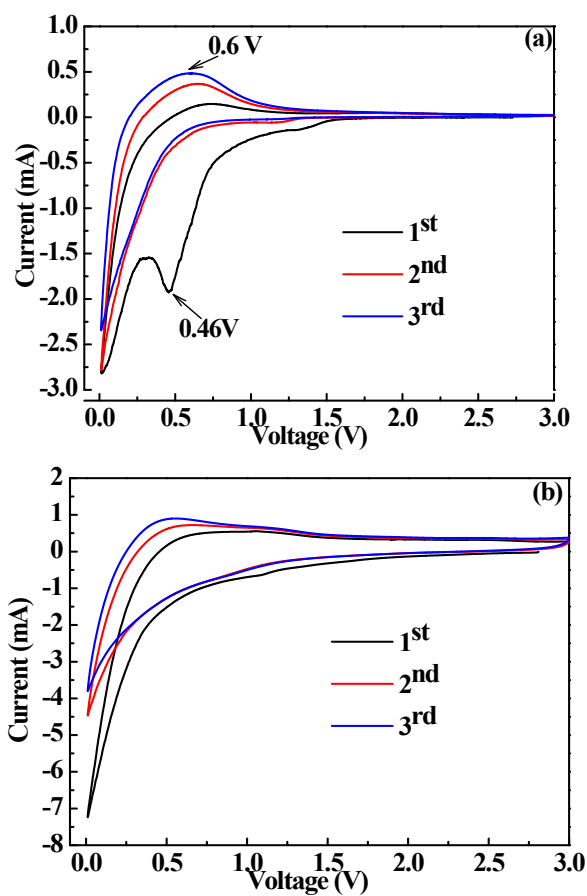

Fig. S1 CV curves of (a) bulk ZSH and (b) pure rGO electrode for the first three cycles.
